# Supplementary material
Source: PubMed Central journal article supplement (PMC6825294)
Supplement: pnas.1908157116.sapp.pdf [file pnas.1908157116.sapp.pdf]

1 **Supplementary Information**

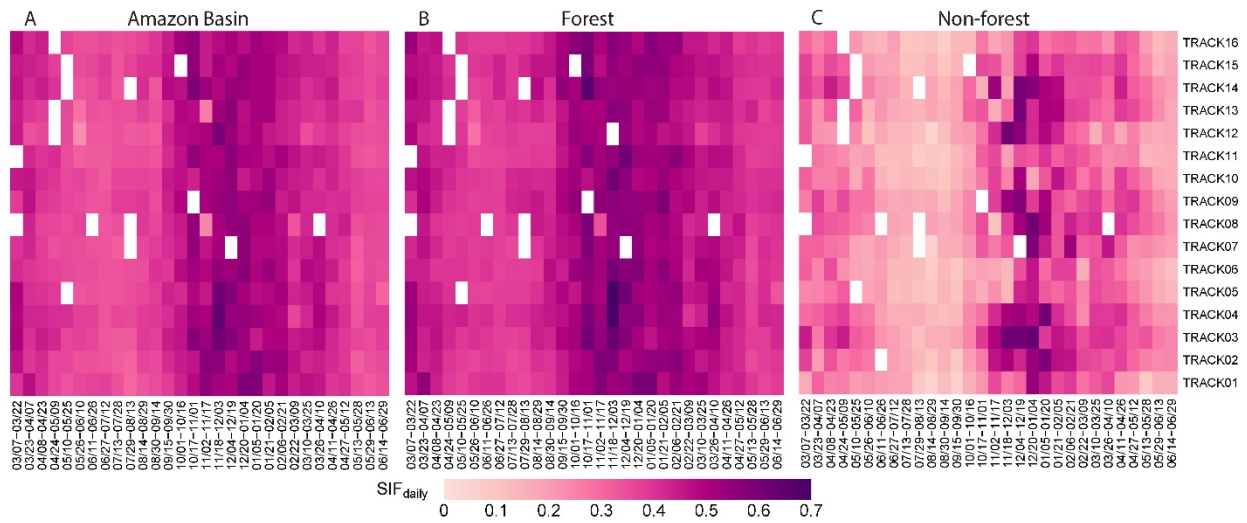

2  
 3 **Fig. S1 | Basin-wide mean daily SIF from TROPOMI March 2018 – June 2019.** (A) The entire  
 4 Amazon Basin. (B) All soundings in forests. (C) All soundings in non-forest. Soundings with  
 5 footprints in water were masked out. Changes in mean daily and instantaneous SIF for the Amazon  
 6 Basin, forest, and non-forest are further illustrated in figs. S2-4, and the standard errors of the  
 7 means of the observations are listed in tables S1-S3.

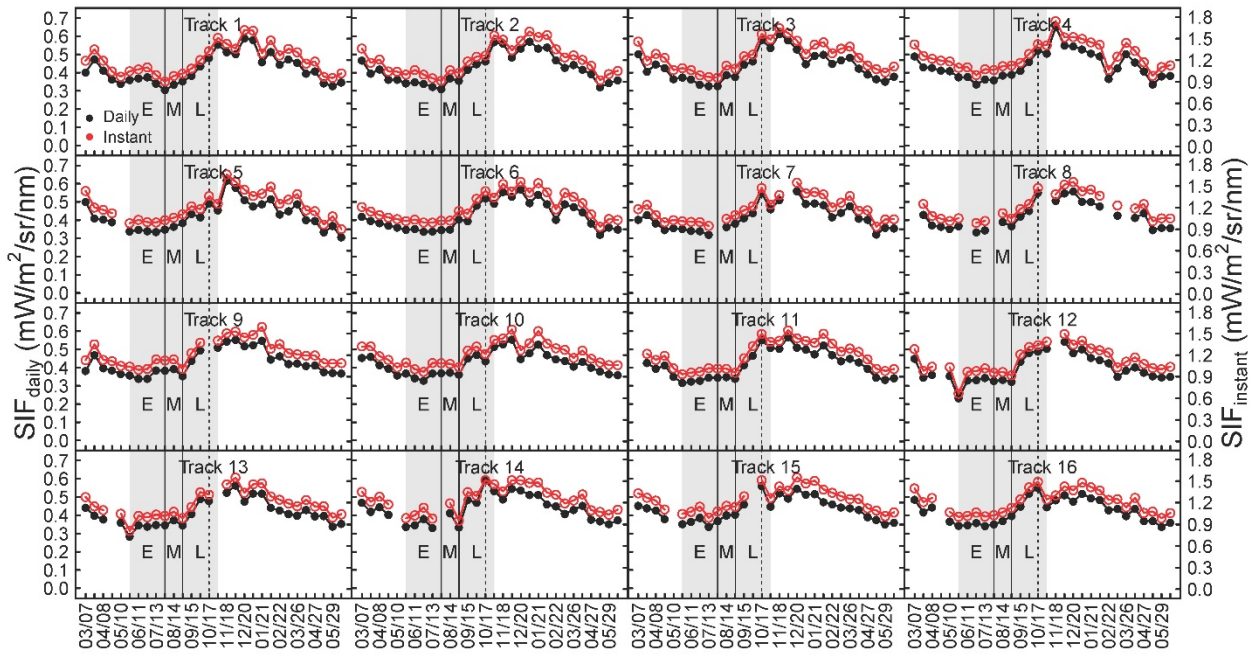

8  
 9 **Fig. S2 | Amazon Basin mean daily and instantaneous SIF for each of TROPOMI's tracks.**  
 10 Areas shaded in gray represent the early (E), mid (M), and late (L) dry seasons. The dashed line  
 11 approximates when TROPOMI's phase angles are lowest. Dates represent the first day of  
 12 TROPOMI's 16-day revisit cycle. Tick marks are every 16 days and labels are every 32 days.  
 13 The complete date range represented is March 7, 2018 – June 29, 2019.

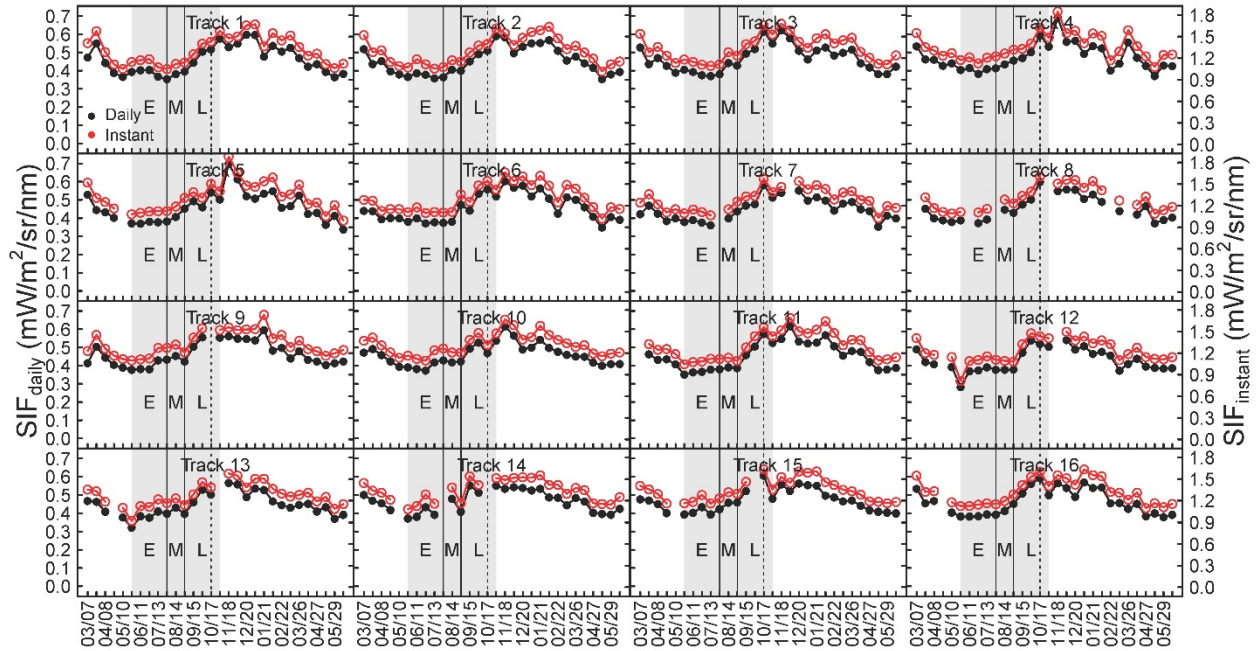

14 **Fig. S3 | Forest mean daily and instantaneous SIF for each of TROPOMI's tracks.** Areas  
 15 shaded in gray represent the early (E), mid (M), and late (L) dry seasons. The dashed line  
 16 approximates when TROPOMI's phase angles are lowest. Dates represent the first day of  
 17 TROPOMI's 16-day revisit cycle. Tick marks are every 16 days and labels are every 32 days.  
 18 The complete date range represented is March 7, 2018 – June 29, 2019.

20

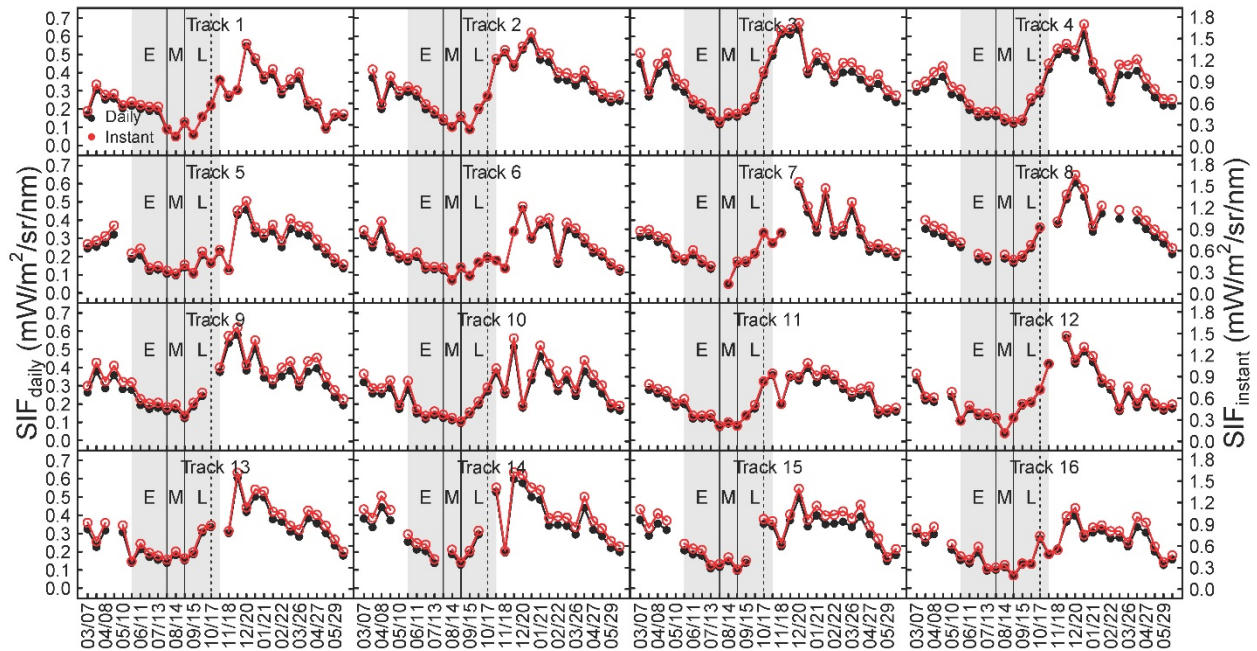

21 **Fig. S4 | Non-forest mean daily and instantaneous SIF for each of TROPOMI's tracks.**  
 22 Areas shaded in gray represent the early (E), mid (M), and late (L) dry seasons. The dashed line  
 23 approximates when TROPOMI's phase angles are lowest. Dates represent the first day of  
 24

25 TROPOMI's 16-day revisit cycle. Tick marks are every 16 days and labels are every 32 days.  
 26 The complete date range represented is March 7, 2018 – June 29, 2019.  
 27

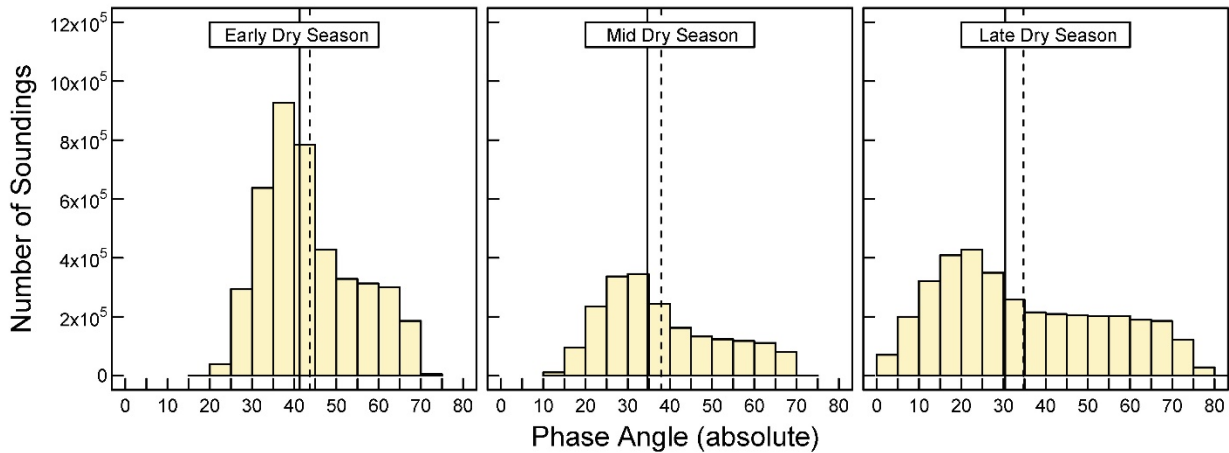

28  
 29 **Fig. S5 | The distribution of the phase angle of TROPOMI soundings in early, mid, and late**  
 30 **dry season. Dashed line is the mean.**  
 31

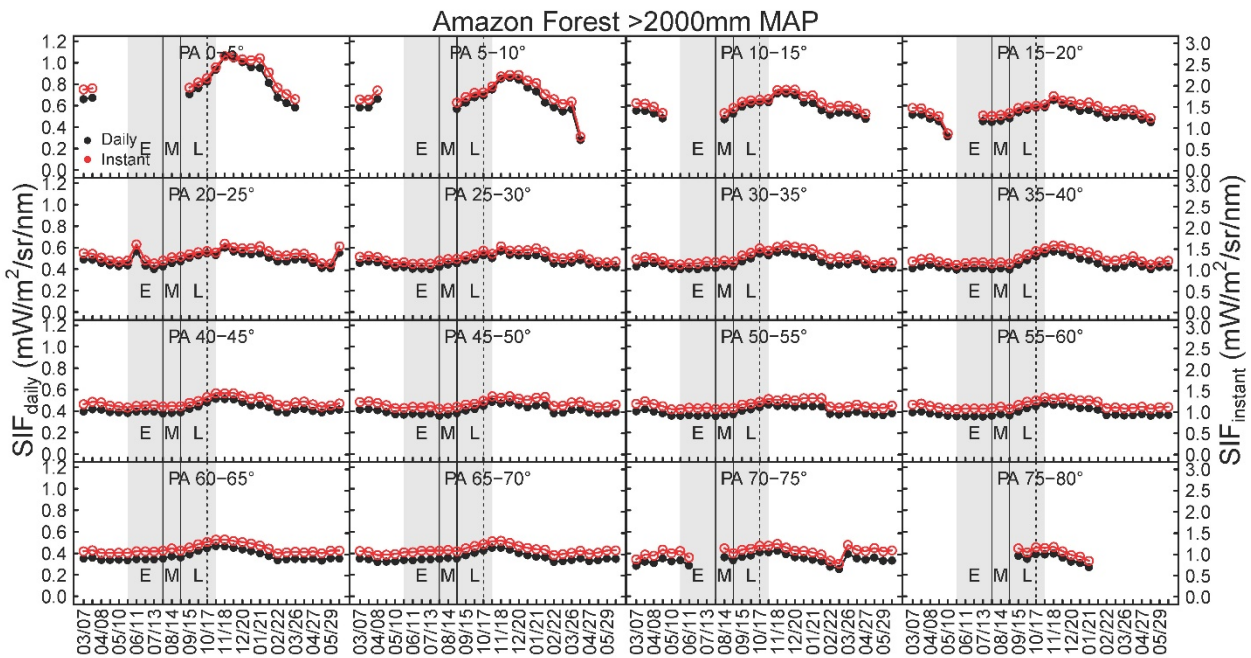

32  
 33 **Fig. S6 |  $SIF_{daily}$  and  $SIF_{instant}$  at different phase angles (PA) for Amazon forest with mean**  
 34 **annual precipitation (MAP) > 2000 mm. Areas shaded in gray represent the early (E), mid**  
 35 **(M), and late (L) dry seasons. The dashed line approximates when TROPOMI's phase angles are**  
 36 **lowest. Dates represent the first day of TROPOMI's 16-day revisit cycle. Tick marks are every**  
 37 **16 days and labels are every 32 days. The complete date range represented is March 7, 2018 –**  
 38 **June 29, 2019.**  
 39

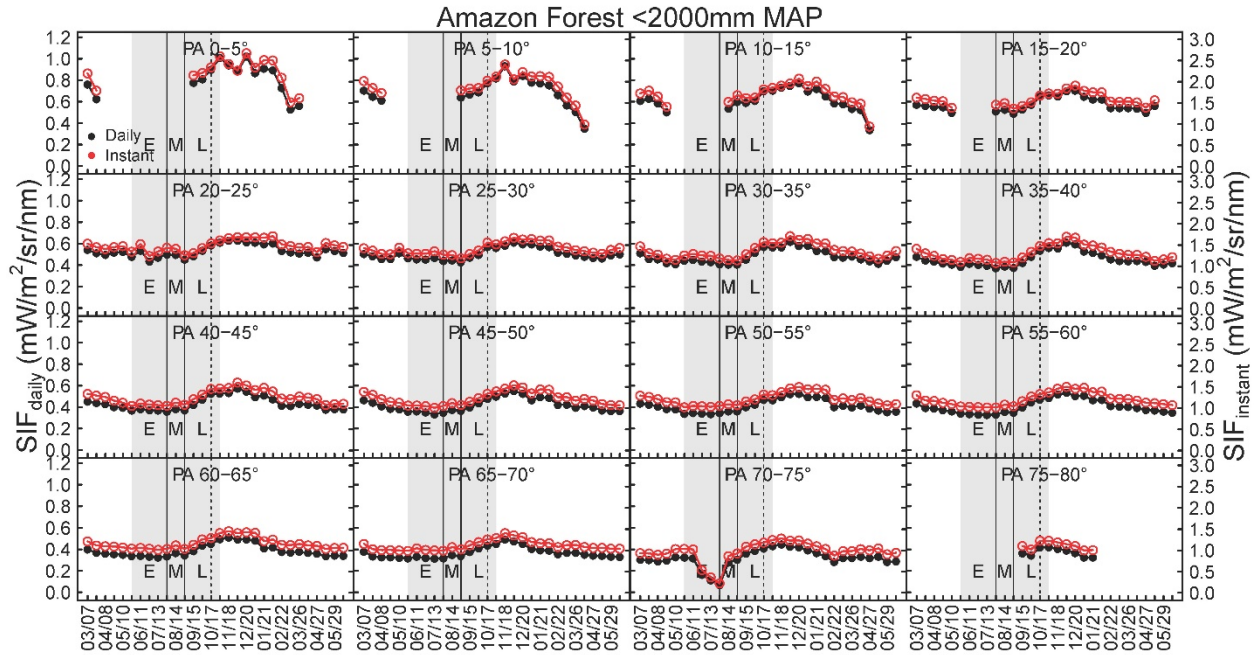

40  
 41 **Fig. S7 | SIF<sub>daily</sub> and SIF<sub>instant</sub> at different phase angles (PA) for Amazon forest with mean**  
 42 **annual precipitation (MAP) < 2000 mm.** Areas shaded in gray represent the early (E), mid  
 43 (M), and late (L) dry seasons. The dashed line approximates when TROPOMI's phase angles are  
 44 lowest. Dates represent the first day of TROPOMI's 16-day revisit cycle. Tick marks are every  
 45 16 days and labels are every 32 days. The complete date range represented is March 7, 2018 –  
 46 June 29, 2019.

47  
 48

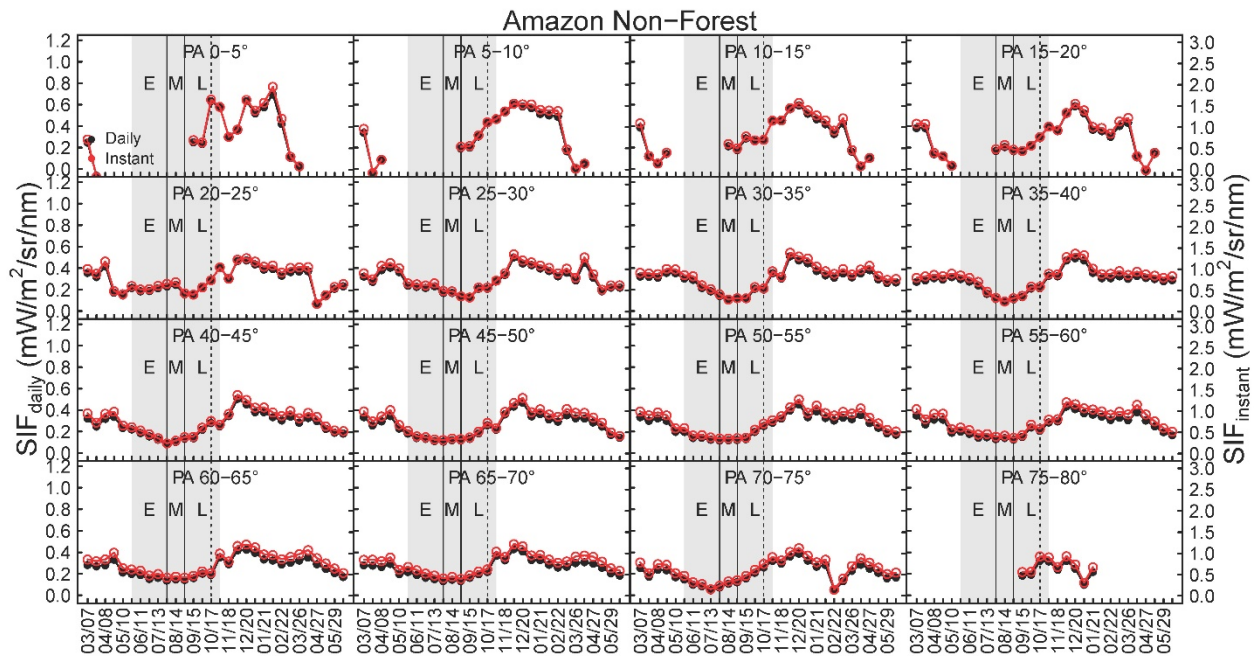

49  
 50 **Fig. S8 | SIF<sub>daily</sub> and SIF<sub>instant</sub> at different phase angles (PA) for TROPOMI soundings of**  
 51 **non-forest, non-water land cover in the Amazon.** Areas shaded in gray represent the early (E),

52 mid (M), and late (L) dry seasons. The dashed line approximates when TROPOMI's phase  
 53 angles are lowest. Dates represent the first day of TROPOMI's 16-day revisit cycle. Tick marks  
 54 are every 16 days and labels are every 32 days. The complete date range represented is March 7,  
 55 2018 – June 29, 2019.  
 56

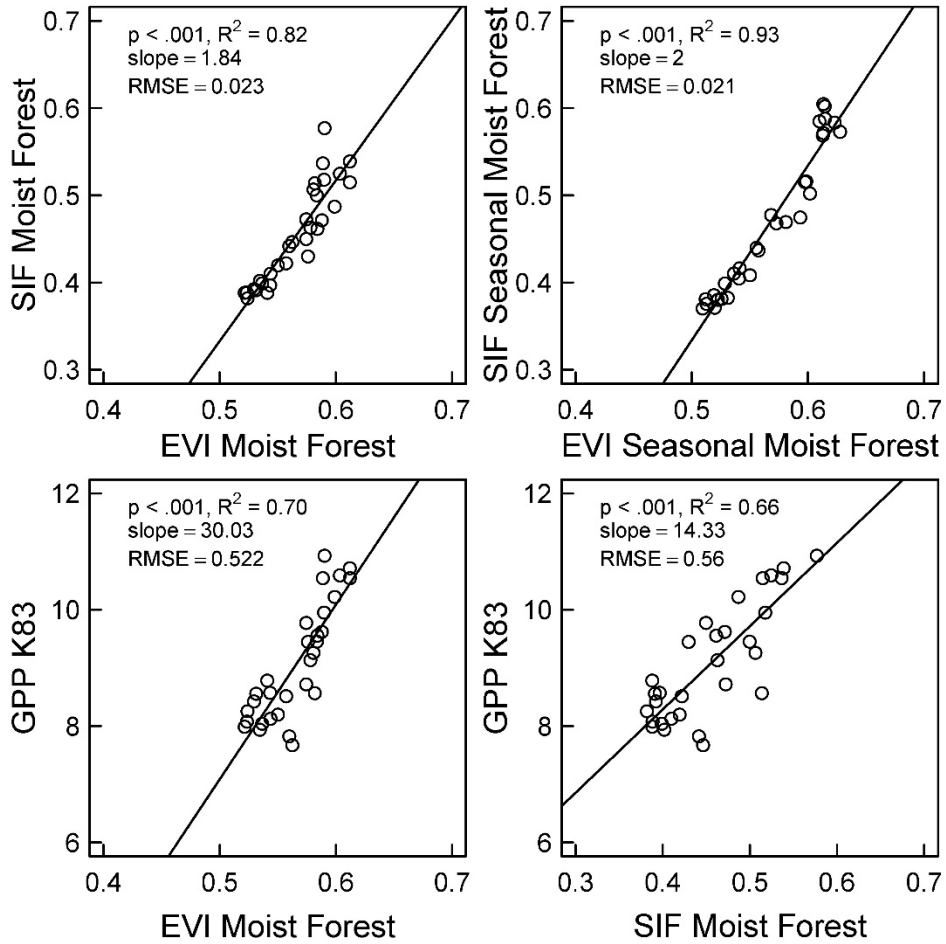

57  
 58 **Fig. S9 | Relationships between MODIS EVI, TROPOMI SIF, and GPP from the K83 eddy**  
 59 **tower site.**  
 60

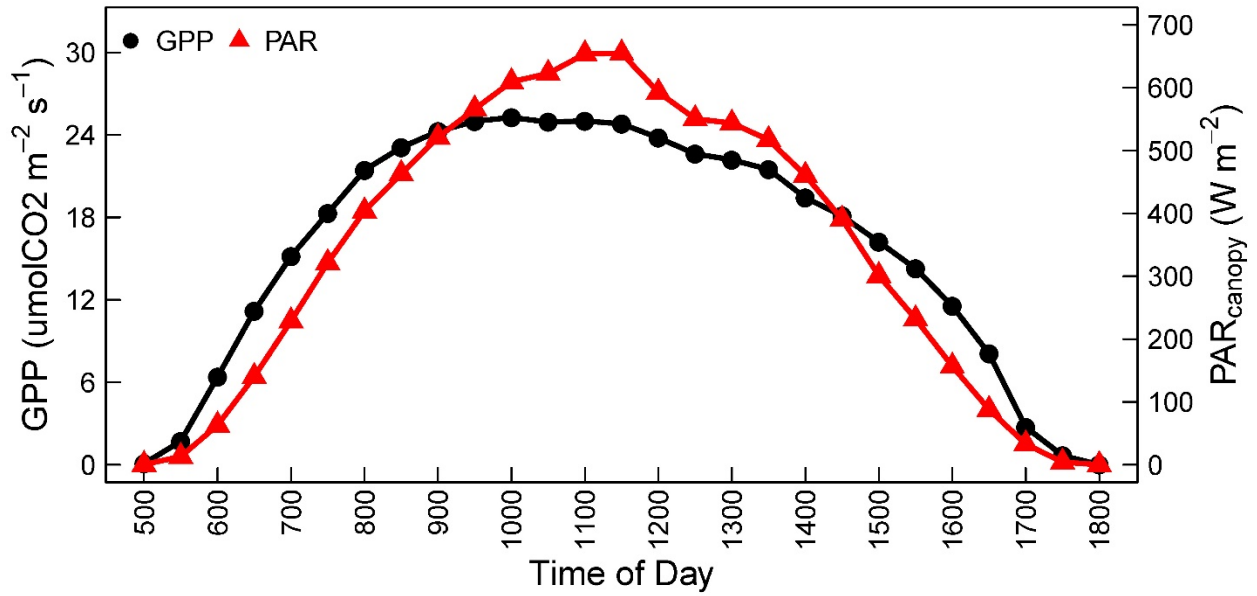

61  
 62 **Fig. S10 | Diurnal GPP and PAR at K83.** Mean half-hourly GPP and PAR from K83 eddy flux  
 63 tower 2000-2004.

64  
 65

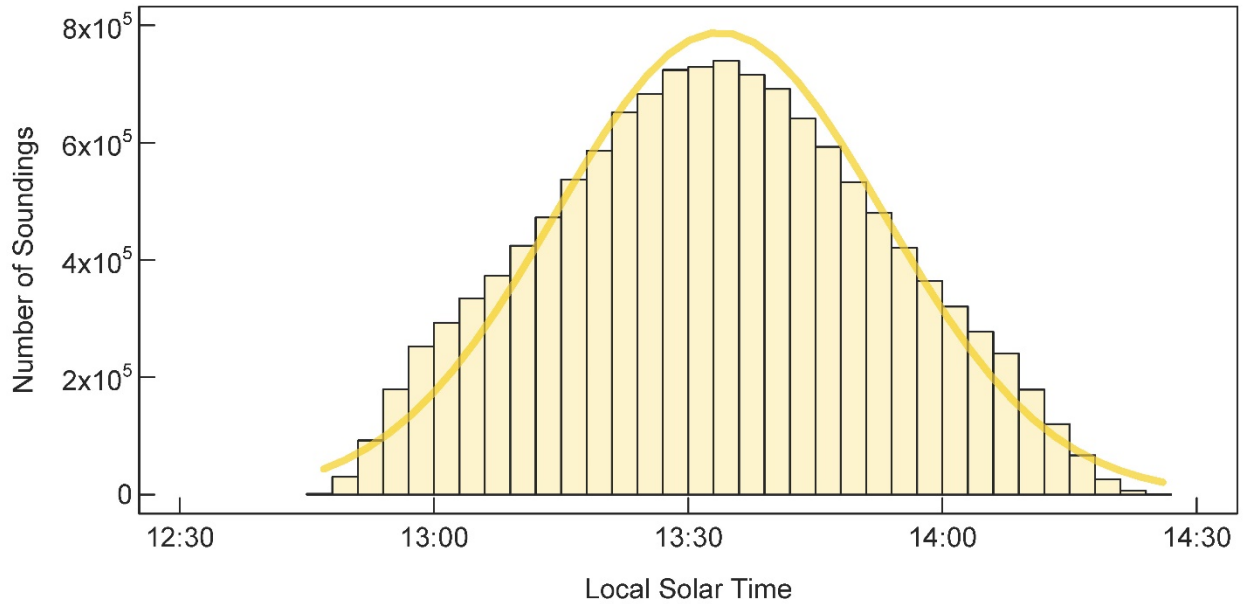

66  
 67 **Fig. S11 | Frequency of the local solar time of TROPOMI soundings in the Amazon.**

68  
 69

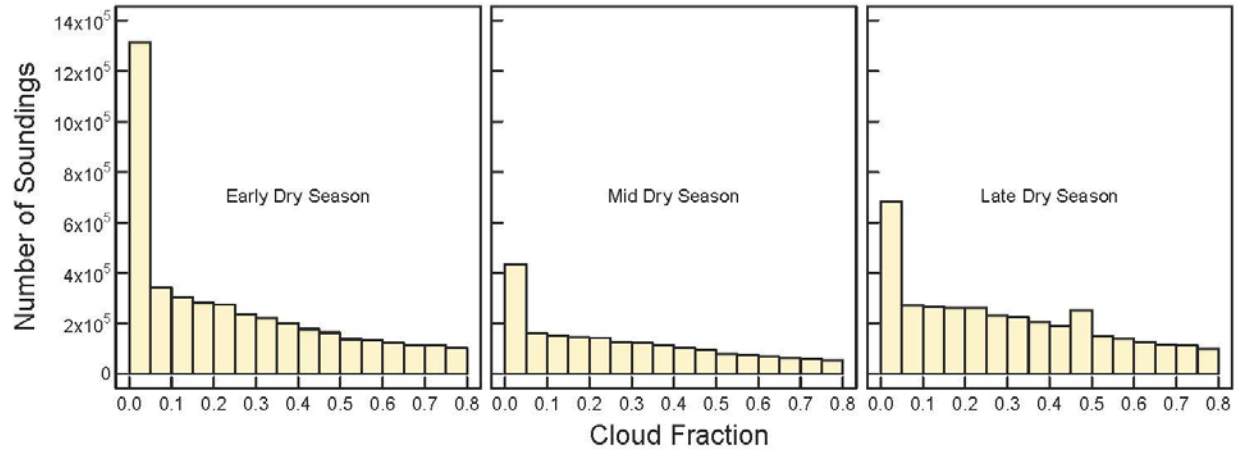

70  
71 **Fig. S12 | Frequency histograms of early, mid, and late dry season cloud fraction of**  
72 **TROPOMI SIF soundings.**

73  
74 **Table S1. Standard error of the mean of SIF<sub>instant</sub> observations in the Amazon Basin (Fig.**  
75 **S1A). Column header is the track number.**

|       | 1     | 2     | 3     | 4     | 5     | 6     | 7     | 8     | 9     | 10    | 11    | 12    | 13    | 14    | 15    | 16    |
|-------|-------|-------|-------|-------|-------|-------|-------|-------|-------|-------|-------|-------|-------|-------|-------|-------|
| 03/07 | 0.004 | 0.002 | 0.001 | 0.001 | 0.001 | 0.001 | 0.001 | NA    | 0.001 | 0.002 | NA    | 0.001 | 0.001 | 0.001 | 0.001 | 0.001 |
| 03/23 | 0.002 | 0.001 | 0.002 | 0.001 | 0.001 | 0.001 | 0.001 | 0.001 | 0.001 | 0.001 | 0.001 | 0.002 | 0.001 | 0.002 | 0.002 | 0.001 |
| 04/08 | 0.001 | 0.001 | 0.001 | 0.001 | 0.001 | 0.001 | 0.001 | 0.001 | 0.001 | 0.001 | 0.001 | 0.001 | 0.001 | 0.001 | 0.001 | 0.001 |
| 04/24 | 0.001 | 0.001 | 0.001 | 0.001 | 0.001 | 0.001 | 0.001 | 0.001 | 0.001 | 0.001 | 0.001 | NA    | NA    | 0.001 | 0.001 | NA    |
| 05/10 | 0.001 | 0.001 | 0.001 | 0.001 | NA    | 0.001 | 0.001 | 0.001 | 0.001 | 0.001 | 0.001 | 0.001 | 0.001 | NA    | NA    | 0.001 |
| 05/26 | 0.001 | 0.001 | 0.001 | 0.001 | 0.001 | 0.001 | 0.001 | 0.001 | 0.001 | 0.001 | 0.001 | 0.001 | 0.001 | 0.001 | 0.001 | 0.001 |
| 06/11 | 0.001 | 0.02  | 0.001 | 0.001 | 0.001 | 0.001 | 0.001 | NA    | 0.001 | 0.001 | 0.001 | 0.001 | 0.001 | 0.001 | 0.001 | 0.001 |
| 06/27 | 0.001 | 0.001 | 0.001 | 0.001 | 0.001 | 0.001 | 0.001 | 0.001 | 0.001 | 0.001 | 0.001 | 0.001 | 0.001 | 0.001 | 0.001 | 0.001 |
| 07/13 | 0.001 | 0.001 | 0.001 | 0.001 | 0.001 | 0.001 | 0.001 | 0.001 | 0.001 | 0.001 | 0.001 | 0.001 | 0.001 | 0.001 | 0.001 | 0.001 |
| 07/29 | 0.001 | 0.001 | 0.001 | 0.001 | 0.001 | 0.001 | NA    | NA    | 0.001 | 0.001 | 0.001 | 0.001 | 0.001 | NA    | 0.001 | 0.001 |
| 08/14 | 0.001 | 0.001 | 0.001 | 0.001 | 0.001 | 0.001 | 0.001 | 0.001 | 0.001 | 0.001 | 0.001 | 0.001 | 0.001 | 0.001 | 0.001 | 0.001 |
| 08/30 | 0.001 | 0.001 | 0.001 | 0.001 | 0.001 | 0.001 | 0.001 | 0.001 | 0.001 | 0.001 | 0.001 | 0.001 | 0.001 | 0.001 | 0.001 | 0.001 |
| 09/15 | 0.001 | 0.001 | 0.001 | 0.001 | 0.001 | 0.001 | 0.001 | 0.001 | 0.001 | 0.001 | 0.001 | 0.001 | 0.001 | 0.001 | 0.001 | 0.001 |
| 10/01 | 0.001 | 0.001 | 0.001 | 0.001 | 0.001 | 0.001 | 0.001 | 0.001 | 0.001 | 0.001 | 0.001 | 0.002 | 0.001 | 0.001 | NA    | 0.001 |
| 10/17 | 0.001 | 0.001 | 0.002 | 0.002 | 0.001 | 0.001 | 0.001 | 0.001 | NA    | 0.001 | 0.001 | 0.001 | 0.001 | 0.006 | 0.001 | 0.001 |
| 11/02 | 0.001 | 0.001 | 0.001 | 0.001 | 0.002 | 0.001 | 0.002 | 0.015 | 0.001 | 0.001 | 0.001 | 0.001 | 0.046 | 0.002 | 0.002 | 0.001 |
| 11/18 | 0.001 | 0.002 | 0.002 | 0.002 | 0.002 | 0.001 | 0.002 | 0.001 | 0.002 | 0.002 | 0.002 | 0.049 | 0.002 | 0.002 | 0.002 | 0.002 |
| 12/04 | 0.001 | 0.001 | 0.002 | 0.002 | 0.002 | 0.001 | NA    | 0.001 | 0.002 | 0.001 | 0.001 | 0.001 | 0.001 | 0.001 | 0.001 | 0.001 |
| 12/20 | 0.001 | 0.002 | 0.001 | 0.001 | 0.001 | 0.002 | 0.001 | 0.001 | 0.001 | 0.002 | 0.001 | 0.001 | 0.001 | 0.001 | 0.001 | 0.001 |
| 01/05 | 0.001 | 0.002 | 0.002 | 0.002 | 0.001 | 0.001 | 0.001 | 0.001 | 0.001 | 0.001 | 0.001 | 0.001 | 0.001 | 0.001 | 0.002 | 0.001 |
| 01/21 | 0.001 | 0.001 | 0.001 | 0.001 | 0.002 | 0.001 | 0.001 | 0.001 | 0.002 | 0.001 | 0.002 | 0.002 | 0.002 | 0.001 | 0.001 | 0.001 |
| 02/06 | 0.001 | 0.001 | 0.001 | 0.002 | 0.001 | 0.001 | 0.002 | 0.002 | 0.002 | 0.002 | 0.002 | 0.001 | 0.001 | 0.002 | 0.002 | 0.002 |
| 02/22 | 0.001 | 0.001 | 0.001 | 0.001 | 0.001 | 0.001 | 0.001 | 0.045 | 0.001 | 0.001 | 0.001 | 0.001 | 0.001 | 0.001 | 0.001 | 0.001 |
| 03/10 | 0.002 | 0.002 | 0.001 | 0.001 | 0.001 | 0.001 | 0.001 | 0.001 | 0.001 | 0.001 | 0.002 | 0.001 | 0.001 | 0.001 | 0.001 | 0.001 |
| 03/26 | 0.001 | 0.001 | 0.001 | 0.002 | 0.002 | 0.001 | 0.001 | NA    | 0.002 | 0.001 | 0.001 | 0.001 | 0.001 | 0.002 | 0.001 | 0.001 |

|       |       |       |       |       |       |       |       |       |       |       |       |       |       |       |       |       |
|-------|-------|-------|-------|-------|-------|-------|-------|-------|-------|-------|-------|-------|-------|-------|-------|-------|
| 04/11 | 0.001 | 0.001 | 0.001 | 0.001 | 0.001 | 0.001 | 0.001 | 0.001 | 0.001 | 0.001 | 0.001 | 0.001 | 0.001 | 0.001 | 0.001 | 0.001 |
| 04/27 | 0.001 | 0.001 | 0.001 | 0.001 | 0.001 | 0.001 | 0.001 | 0.001 | 0.001 | 0.001 | 0.001 | 0.001 | 0.001 | 0.001 | 0.001 | 0.001 |
| 05/13 | 0.002 | 0.001 | 0.001 | 0.001 | 0.001 | 0.001 | 0.001 | 0.001 | 0.001 | 0.001 | 0.001 | 0.001 | 0.001 | 0.001 | 0.001 | 0.001 |
| 05/29 | 0.001 | 0.001 | 0.001 | 0.001 | 0.001 | 0.001 | 0.001 | 0.001 | 0.001 | 0.001 | 0.001 | 0.001 | 0.001 | 0.001 | 0.001 | 0.001 |
| 06/14 | 0.001 | 0.001 | 0.001 | 0.001 | 0.001 | 0.001 | 0.001 | 0.001 | 0.001 | 0.001 | 0.001 | 0.001 | 0.001 | 0.001 | 0.001 | 0.001 |

76 **Table S2. Standard error of the mean of SIF<sub>instant</sub> observations in the Amazon forest (Fig.**  
77 **S1B).** Column header is the track number.

|       | 1     | 2     | 3     | 4     | 5     | 6     | 7     | 8     | 9     | 10    | 11    | 12    | 13    | 14    | 15    | 16    |
|-------|-------|-------|-------|-------|-------|-------|-------|-------|-------|-------|-------|-------|-------|-------|-------|-------|
| 03/07 | 0.011 | 0.004 | 0.003 | 0.004 | 0.005 | 0.004 | 0.004 | NA    | 0.004 | 0.006 | NA    | 0.003 | 0.004 | 0.003 | 0.003 | 0.004 |
| 03/23 | 0.004 | 0.004 | 0.007 | 0.005 | 0.004 | 0.003 | 0.003 | 0.004 | 0.004 | 0.004 | 0.003 | 0.003 | 0.004 | 0.004 | 0.005 | 0.004 |
| 04/08 | 0.004 | 0.003 | 0.003 | 0.003 | 0.004 | 0.005 | 0.003 | 0.004 | 0.003 | 0.003 | 0.003 | 0.003 | 0.003 | 0.003 | 0.003 | 0.003 |
| 04/24 | 0.004 | 0.003 | 0.003 | 0.002 | 0.003 | 0.003 | 0.003 | 0.003 | 0.002 | 0.003 | 0.004 | NA    | NA    | 0.002 | 0.002 | NA    |
| 05/10 | 0.003 | 0.003 | 0.003 | 0.002 | NA    | 0.002 | 0.003 | 0.002 | 0.002 | 0.003 | 0.002 | 0.002 | 0.002 | NA    | NA    | 0.002 |
| 05/26 | 0.002 | 0.002 | 0.002 | 0.002 | 0.002 | 0.003 | 0.003 | 0.003 | 0.002 | 0.002 | 0.003 | 0.003 | 0.003 | 0.002 | 0.002 | 0.003 |
| 06/11 | 0.003 | NA    | 0.002 | 0.002 | 0.003 | 0.003 | 0.002 | NA    | 0.002 | 0.002 | 0.002 | 0.002 | 0.002 | 0.002 | 0.002 | 0.002 |
| 06/27 | 0.002 | 0.002 | 0.002 | 0.002 | 0.002 | 0.002 | 0.002 | 0.002 | 0.002 | 0.002 | 0.002 | 0.002 | 0.002 | 0.002 | 0.002 | 0.002 |
| 07/13 | 0.003 | 0.002 | 0.002 | 0.002 | 0.002 | 0.002 | 0.002 | 0.002 | 0.002 | 0.002 | 0.002 | 0.002 | 0.002 | 0.002 | 0.002 | 0.002 |
| 07/29 | 0.002 | 0.002 | 0.002 | 0.002 | 0.003 | 0.003 | NA    | NA    | 0.002 | 0.002 | 0.003 | 0.002 | 0.002 | NA    | 0.002 | 0.002 |
| 08/14 | 0.003 | 0.003 | 0.002 | 0.002 | 0.002 | 0.003 | 0.004 | 0.002 | 0.002 | 0.002 | 0.002 | 0.003 | 0.002 | 0.002 | 0.002 | 0.002 |
| 08/30 | 0.002 | 0.002 | 0.002 | 0.002 | 0.002 | 0.002 | 0.003 | 0.002 | 0.002 | 0.002 | 0.002 | 0.002 | 0.002 | 0.002 | 0.003 | 0.003 |
| 09/15 | 0.004 | 0.004 | 0.003 | 0.002 | 0.003 | 0.003 | 0.002 | 0.002 | 0.002 | 0.003 | 0.003 | 0.003 | 0.003 | 0.003 | 0.003 | 0.003 |
| 10/01 | 0.003 | 0.003 | 0.003 | 0.003 | 0.003 | 0.004 | 0.003 | 0.003 | 0.003 | 0.004 | 0.005 | 0.005 | 0.003 | 0.003 | NA    | 0.004 |
| 10/17 | 0.004 | 0.004 | 0.008 | 0.005 | 0.005 | 0.005 | 0.007 | 0.006 | NA    | 0.003 | 0.006 | 0.005 | 0.005 | 0.012 | 0.004 | 0.005 |
| 11/02 | 0.005 | 0.005 | 0.006 | 0.004 | 0.005 | 0.008 | 0.005 | 0.022 | 0.004 | 0.004 | 0.005 | 0.006 | 0.053 | 0.007 | 0.006 | 0.005 |
| 11/18 | 0.008 | 0.009 | 0.006 | 0.006 | 0.007 | 0.006 | 0.007 | 0.005 | 0.006 | 0.005 | 0.007 | 0.063 | 0.007 | 0.005 | 0.006 | 0.005 |
| 12/04 | 0.004 | 0.005 | 0.007 | 0.009 | 0.006 | 0.005 | NA    | 0.005 | 0.005 | 0.006 | 0.004 | 0.008 | 0.004 | 0.005 | 0.005 | 0.006 |
| 12/20 | 0.006 | 0.007 | 0.005 | 0.005 | 0.007 | 0.006 | 0.006 | 0.006 | 0.007 | 0.005 | 0.006 | 0.007 | 0.006 | 0.005 | 0.005 | 0.006 |
| 01/05 | 0.005 | 0.006 | 0.008 | 0.006 | 0.004 | 0.007 | 0.011 | 0.005 | 0.004 | 0.006 | 0.005 | 0.005 | 0.003 | 0.005 | 0.005 | 0.004 |
| 01/21 | 0.004 | 0.005 | 0.003 | 0.004 | 0.005 | 0.005 | 0.006 | 0.005 | 0.007 | 0.005 | 0.005 | 0.009 | 0.007 | 0.004 | 0.004 | 0.004 |
| 02/06 | 0.005 | 0.004 | 0.004 | 0.005 | 0.005 | 0.005 | 0.009 | 0.008 | 0.006 | 0.005 | 0.006 | 0.005 | 0.004 | 0.006 | 0.006 | 0.004 |
| 02/22 | 0.004 | 0.003 | 0.004 | 0.005 | 0.006 | 0.006 | 0.006 | 0.059 | 0.004 | 0.004 | 0.004 | 0.005 | 0.004 | 0.003 | 0.003 | 0.005 |
| 03/10 | 0.005 | 0.004 | 0.004 | 0.003 | 0.004 | 0.005 | 0.004 | 0.004 | 0.003 | 0.004 | 0.007 | 0.006 | 0.005 | 0.004 | 0.004 | 0.004 |
| 03/26 | 0.005 | 0.005 | 0.005 | 0.005 | 0.005 | 0.003 | 0.005 | NA    | 0.006 | 0.003 | 0.004 | 0.003 | 0.003 | 0.004 | 0.003 | 0.003 |
| 04/11 | 0.003 | 0.003 | 0.004 | 0.003 | 0.003 | 0.006 | 0.005 | 0.003 | 0.003 | 0.003 | 0.003 | 0.003 | 0.005 | 0.003 | 0.003 | 0.003 |
| 04/27 | 0.004 | 0.003 | 0.003 | 0.003 | 0.004 | 0.003 | 0.003 | 0.003 | 0.003 | 0.003 | 0.003 | 0.003 | 0.002 | 0.002 | 0.002 | 0.006 |
| 05/13 | 0.005 | 0.003 | 0.002 | 0.002 | 0.002 | 0.002 | 0.002 | 0.002 | 0.002 | 0.003 | 0.003 | 0.003 | 0.002 | 0.002 | 0.002 | 0.002 |
| 05/29 | 0.003 | 0.002 | 0.002 | 0.002 | 0.002 | 0.003 | 0.002 | 0.002 | 0.002 | 0.002 | 0.002 | 0.003 | 0.002 | 0.002 | 0.002 | 0.002 |
| 06/14 | 0.003 | 0.002 | 0.002 | 0.002 | 0.002 | 0.003 | 0.002 | 0.002 | 0.002 | 0.002 | 0.002 | 0.002 | 0.002 | 0.002 | 0.002 | 0.002 |



79  
80

**Table S3. Standard error of the mean of SIF<sub>instant</sub> observations in Amazon non-forest (Fig. S1C). Column header is the track number.**

|       | 1     | 2     | 3     | 4     | 5     | 6     | 7     | 8     | 9     | 10    | 11    | 12    | 13    | 14    | 15    | 16    |
|-------|-------|-------|-------|-------|-------|-------|-------|-------|-------|-------|-------|-------|-------|-------|-------|-------|
| 03/07 | 0.004 | 0.002 | 0.002 | 0.002 | 0.001 | 0.001 | 0.001 | NA    | 0.001 | 0.002 | NA    | 0.001 | 0.001 | 0.001 | 0.001 | 0.002 |
| 03/23 | 0.002 | 0.001 | 0.002 | 0.001 | 0.001 | 0.001 | 0.001 | 0.001 | 0.001 | 0.001 | 0.001 | 0.002 | 0.002 | 0.002 | 0.002 | 0.001 |
| 04/08 | 0.001 | 0.001 | 0.001 | 0.001 | 0.001 | 0.001 | 0.001 | 0.002 | 0.002 | 0.001 | 0.001 | 0.001 | 0.001 | 0.001 | 0.001 | 0.001 |
| 04/24 | 0.001 | 0.001 | 0.001 | 0.001 | 0.001 | 0.001 | 0.001 | 0.001 | 0.001 | 0.001 | 0.001 | NA    | NA    | 0.001 | 0.001 | NA    |
| 05/10 | 0.001 | 0.001 | 0.002 | 0.001 | NA    | 0.001 | 0.001 | 0.001 | 0.001 | 0.001 | 0.001 | 0.001 | 0.001 | NA    | NA    | 0.001 |
| 05/26 | 0.001 | 0.001 | 0.001 | 0.001 | 0.001 | 0.001 | 0.001 | 0.001 | 0.001 | 0.001 | 0.001 | 0.002 | 0.001 | 0.001 | 0.001 | 0.001 |
| 06/11 | 0.001 | 0.02  | 0.001 | 0.001 | 0.001 | 0.002 | 0.001 | NA    | 0.001 | 0.001 | 0.001 | 0.001 | 0.001 | 0.001 | 0.001 | 0.001 |
| 06/27 | 0.001 | 0.001 | 0.001 | 0.001 | 0.001 | 0.001 | 0.001 | 0.001 | 0.001 | 0.001 | 0.001 | 0.001 | 0.001 | 0.001 | 0.001 | 0.001 |
| 07/13 | 0.001 | 0.001 | 0.001 | 0.001 | 0.001 | 0.001 | 0.001 | 0.001 | 0.001 | 0.001 | 0.001 | 0.001 | 0.001 | 0.001 | 0.001 | 0.001 |
| 07/29 | 0.001 | 0.001 | 0.001 | 0.001 | 0.001 | 0.001 | NA    | NA    | 0.001 | 0.001 | 0.001 | 0.001 | 0.001 | NA    | 0.001 | 0.001 |
| 08/14 | 0.001 | 0.001 | 0.001 | 0.001 | 0.001 | 0.001 | 0.001 | 0.001 | 0.001 | 0.001 | 0.001 | 0.001 | 0.001 | 0.001 | 0.001 | 0.001 |
| 08/30 | 0.001 | 0.001 | 0.001 | 0.001 | 0.001 | 0.001 | 0.001 | 0.001 | 0.001 | 0.001 | 0.001 | 0.001 | 0.001 | 0.001 | 0.001 | 0.001 |
| 09/15 | 0.001 | 0.001 | 0.001 | 0.001 | 0.001 | 0.001 | 0.001 | 0.001 | 0.001 | 0.001 | 0.001 | 0.001 | 0.001 | 0.001 | 0.001 | 0.001 |
| 10/01 | 0.001 | 0.001 | 0.001 | 0.001 | 0.001 | 0.001 | 0.001 | 0.001 | 0.001 | 0.001 | 0.002 | 0.002 | 0.001 | 0.001 | NA    | 0.001 |
| 10/17 | 0.001 | 0.002 | 0.002 | 0.002 | 0.001 | 0.001 | 0.002 | 0.001 | NA    | 0.001 | 0.001 | 0.001 | 0.001 | 0.006 | 0.001 | 0.001 |
| 11/02 | 0.001 | 0.002 | 0.002 | 0.002 | 0.002 | 0.001 | 0.002 | 0.02  | 0.001 | 0.001 | 0.001 | 0.001 | 0.081 | 0.002 | 0.002 | 0.001 |
| 11/18 | 0.001 | 0.002 | 0.002 | 0.002 | 0.003 | 0.001 | 0.002 | 0.002 | 0.002 | 0.002 | 0.002 | NA    | 0.002 | 0.002 | 0.002 | 0.002 |
| 12/04 | 0.001 | 0.001 | 0.002 | 0.002 | 0.002 | 0.001 | NA    | 0.001 | 0.002 | 0.001 | 0.001 | 0.001 | 0.001 | 0.001 | 0.001 | 0.002 |
| 12/20 | 0.002 | 0.002 | 0.001 | 0.001 | 0.002 | 0.002 | 0.001 | 0.001 | 0.002 | 0.002 | 0.001 | 0.001 | 0.001 | 0.001 | 0.001 | 0.001 |
| 01/05 | 0.002 | 0.002 | 0.002 | 0.002 | 0.001 | 0.001 | 0.001 | 0.001 | 0.002 | 0.001 | 0.002 | 0.002 | 0.001 | 0.001 | 0.002 | 0.002 |
| 01/21 | 0.001 | 0.002 | 0.001 | 0.002 | 0.002 | 0.001 | 0.001 | 0.001 | 0.002 | 0.001 | 0.002 | 0.002 | 0.003 | 0.002 | 0.001 | 0.002 |
| 02/06 | 0.001 | 0.001 | 0.002 | 0.002 | 0.002 | 0.002 | 0.002 | 0.003 | 0.002 | 0.002 | 0.003 | 0.001 | 0.001 | 0.002 | 0.002 | 0.002 |
| 02/22 | 0.002 | 0.001 | 0.002 | 0.002 | 0.001 | 0.001 | 0.002 | 0.067 | 0.001 | 0.001 | 0.002 | 0.002 | 0.001 | 0.001 | 0.001 | 0.002 |
| 03/10 | 0.002 | 0.002 | 0.002 | 0.001 | 0.001 | 0.001 | 0.001 | 0.001 | 0.001 | 0.001 | 0.002 | 0.002 | 0.001 | 0.001 | 0.001 | 0.001 |
| 03/26 | 0.001 | 0.001 | 0.002 | 0.002 | 0.002 | 0.001 | 0.001 | NA    | 0.003 | 0.001 | 0.001 | 0.001 | 0.002 | 0.002 | 0.001 | 0.001 |
| 04/11 | 0.001 | 0.001 | 0.001 | 0.001 | 0.001 | 0.001 | 0.002 | 0.001 | 0.001 | 0.001 | 0.001 | 0.001 | 0.001 | 0.001 | 0.001 | 0.001 |
| 04/27 | 0.001 | 0.001 | 0.001 | 0.001 | 0.001 | 0.001 | 0.001 | 0.001 | 0.001 | 0.001 | 0.001 | 0.001 | 0.001 | 0.001 | 0.001 | 0.001 |
| 05/13 | 0.002 | 0.002 | 0.001 | 0.001 | 0.001 | 0.001 | 0.001 | 0.001 | 0.001 | 0.001 | 0.001 | 0.001 | 0.001 | 0.001 | 0.001 | 0.001 |
| 05/29 | 0.001 | 0.001 | 0.001 | 0.001 | 0.001 | 0.001 | 0.001 | 0.001 | 0.001 | 0.001 | 0.001 | 0.001 | 0.001 | 0.001 | 0.001 | 0.001 |
| 06/14 | 0.001 | 0.001 | 0.001 | 0.001 | 0.001 | 0.001 | 0.001 | 0.001 | 0.001 | 0.001 | 0.001 | 0.001 | 0.001 | 0.001 | 0.001 | 0.001 |

81

**Table S4. Area of the Amazon Basin and land cover types used in our study.**

|                       |                         |
|-----------------------|-------------------------|
| Region                | Area (km <sup>2</sup> ) |
| Amazon                | 5,974,715               |
| Forest                | 3,787,974               |
| Forest >2000mm<br>MAP | 2,815,460               |
| Forest <2000mm<br>MAP | 952,526                 |
| Non-forest            | 698,303                 |
